# Supplementary material for: Small Leucine-Rich Proteoglycan PODNL1 Identified as a Potential Tumor Matrix-Mediated Biomarker for Prognosis and Immunotherapy in a Pan-Cancer Setting
Source: MDPI journal article supplement (doi:10.3390/cimb45070386), 2023-07-22
Supplement: s1 [file s1]

# Small leucine-rich proteoglycan PODNL1 identified as a promising tumor matrix-mediated biomarker for prognosis and immunotherapy in a pan-cancer setting

Geyang Dai <sup>1,2</sup>, Yue Sun <sup>1,2</sup>, Rui Wei <sup>1,2</sup> and Ling Xi <sup>1,2,\*</sup>

Correspondence: Ling Xi (lxi@tjh.tjmu.edu.cn)

**Table S1.** List of abbreviations

| Abbreviation | Full name                                                                                        |
|--------------|--------------------------------------------------------------------------------------------------|
| ACC          | Adrenocortical carcinoma                                                                         |
| ACVRL1       | Activin A Receptor Like Type 1                                                                   |
| AKT          | The serine/threonine protein kinase                                                              |
| APM          | Antigen processing machinery                                                                     |
| AUC          | The area under the ROC curves                                                                    |
| BLCA         | Bladder urothelial carcinoma                                                                     |
| BMP          | Bone morphogenetic proteins                                                                      |
| BRAF         | V-ras murine sarcoma viral oncogene homolog B1                                                   |
| BRCA         | Breast invasive carcinoma                                                                        |
| CAFs         | Cancer-associated fibroblasts                                                                    |
| CCLE         | Cancer Cell Line Encyclopedia                                                                    |
| CCND1        | Cyclin D1                                                                                        |
| CD276        | Cluster of differentiation 276                                                                   |
| CD44         | Cluster of differentiation 44                                                                    |
| CESC         | Cervical squamous cell carcinoma and endocervical adenocarcinoma                                 |
| CHOL         | Cholangiocarcinoma                                                                               |
| CIBERSORT    | Cell-type Identification By Estimating Relative Subsets Of RNA Transcripts                       |
| COAD         | Colon adenocarcinoma                                                                             |
| COL1A1       | Collagen type I alpha 1 chain                                                                    |
| COL1A2       | Collagen type I alpha 2 chain                                                                    |
| COL5A1       | Collagen Type V Alpha 1 Chain                                                                    |
| CR           | The complete response                                                                            |
| CTL          | the cytotoxic T lymphocytes                                                                      |
| CTLA4        | Cytotoxic T-Lymphocyte associated protein 4, also named as cluster of differentiation 152, CD152 |
| CTNNB1       | Catenin beta-1                                                                                   |
| DDR          | DNA_damage_response                                                                              |

|                  |                                                                                         |
|------------------|-----------------------------------------------------------------------------------------|
| DFS              | Disease-free survival                                                                   |
| DLBC             | Lymphoid neoplasm diffuse large B-cell lymphoma                                         |
| DSS              | Disease-specific survival                                                               |
| ECM              | Extracellular matrix                                                                    |
| EMT              | Epithelial-mesenchymal transition                                                       |
| ENG              | Endoglin                                                                                |
| EPIC             | Estimating the Proportion of Immune and Cancer cells                                    |
| ERK              | Extracellular signal-regulated kinase                                                   |
| ESCA             | Esophageal carcinoma                                                                    |
| ESTIMATE         | Estimation of Stromal and Immune Cells in Malignant Tumor Tissues Using Expression Data |
| GBM              | Glioblastoma multiforme                                                                 |
| GEO              | The Gene Expression Omnibus                                                             |
| GEPIA2           | The Gene Expression Profiling Interactive Analysis                                      |
| GSEA             | Gene Set Enrichment Analysis                                                            |
| GSVA             | Gene set Variation analysis                                                             |
| GTE <sub>x</sub> | The Genotype-Tissue Expression                                                          |
| GTF2I            | General Transcription Factor Ii                                                         |
| HNSC             | Head and neck squamous cell carcinoma                                                   |
| HPA              | The Human Protein Atlas                                                                 |
| HSCs             | Hematopoietic stem cells                                                                |
| ICB              | Immune-checkpoint blockade                                                              |
| IHC              | Immunohistochemistry                                                                    |
| IL               | Interleukin                                                                             |
| JAK              | Janus kinase                                                                            |
| KEGG             | Kyoto Encyclopedia of Genes and Genomes                                                 |
| KICH             | Kidney chromophobe                                                                      |
| KIRC             | Kidney renal clear cell carcinoma                                                       |
| KIRP             | Kidney renal papillary cell carcinoma                                                   |
| K-M              | Kaplan-Meier                                                                            |
| LAML             | Acute myeloid leukemia                                                                  |
| LGG              | Brain lower grade glioma                                                                |
| LIHC             | Liver hepatocellular carcinoma                                                          |
| LincRNAs         | The long coding RNAs                                                                    |
| LRG1             | Leucine-rich $\alpha$ -2 glycoprotein 1                                                 |
| LRP-1            | The low-density lipoprotein receptor-related protein                                    |
| LRR              | Leucine rich repeats                                                                    |
| LUAD             | Lung adenocarcinoma                                                                     |
| LUSC             | Lung squamous cell carcinoma                                                            |
| MAPKs            | The mitogen-activated protein kinases                                                   |
| MCODE            | The Molecular Complex Detection                                                         |

|             |                                                                                           |
|-------------|-------------------------------------------------------------------------------------------|
| MCP-counter | The Microenvironment Cell Populations-counter                                             |
| MDSCs       | Myeloid-derived suppressor cells                                                          |
| MESO        | Mesothelioma                                                                              |
| MET         | Hepatocyte growth factor receptor                                                         |
| MHC         | Major histocompatibility complex                                                          |
| MSI         | Microsatellite Instability                                                                |
| MsigDB      | Molecular signatures database                                                             |
| mTOR        | Mechanistic Target Of Rapamycin Kinase                                                    |
| mUC         | Metastatic urothelial cancer                                                              |
| NACC1       | Nucleus accumbens-associated protein 1                                                    |
| NES         | Nestin                                                                                    |
| NK cells    | Natural killer cells                                                                      |
| NOTCH1      | Neurogenic locus notch homolog protein 1                                                  |
| NOTCH4      | Neurogenic locus notch homolog protein 4                                                  |
| OS          | Overall survival time in day                                                              |
| OV          | Ovarian serous cystadenocarcinoma                                                         |
| PAAD        | Pancreatic adenocarcinoma                                                                 |
| Pan_F_TBRs  | Pan-fibroblast TGF- $\beta$ response signature scores                                     |
| PCA         | Principal component analysis                                                              |
| PCPG        | Pheochromocytoma and paraganglioma                                                        |
| PD          | Progressive disease                                                                       |
| PD-1        | Programmed cell death protein-1                                                           |
| PD-L1       | Programmed cell death-ligand 1, also known as cluster of differentiation 274, CD274       |
| PFS         | Progression-free survival                                                                 |
| PI3K        | Phosphoinositide 3-kinases                                                                |
| PIK3CA      | Phosphatidylinositol-4,5-bisphosphate 3-kinase catalytic subunit alpha                    |
| PODNL1      | Podocan Like 1                                                                            |
| PPI         | The protein-protein interaction                                                           |
| PR          | Partial response                                                                          |
| PRAD        | Prostate adenocarcinoma                                                                   |
| quanTIseq   | A method to quantify the fractions of ten immune cell types from bulk RNA-sequencing data |
| RAF         | Proto-oncogene serine/threonine-protein kinase                                            |
| READ        | Rectum adenocarcinoma                                                                     |
| REXO1       | RNA exonuclease 1 homolog                                                                 |
| Rho         | Rhodopsin                                                                                 |
| ROC         | The Receiver Operating Characteristic                                                     |
| SALL1       | Spalt Like Transcription Factor 1                                                         |
| SARC        | Sarcoma                                                                                   |
| SD          | Stable disease                                                                            |

|               |                                                                      |
|---------------|----------------------------------------------------------------------|
| SKCM          | Skin cutaneous melanoma                                              |
| SLRPs         | Small leucine-rich proteoglycans                                     |
| SMADs         | The small mother against decapentaplegic proteins (SMADs)            |
| SOX2          | Sex determining region Y-Box Transcription Factor 2                  |
| STAD          | Stomach adenocarcinoma                                               |
| STAT          | The signal transducer of activators of transcription                 |
| TCGA          | The Cancer Genome Atlas                                              |
| TGCT          | Testicular germ cell tumors                                          |
| TGFBR1        | Transforming Growth Factor Beta Receptor 1                           |
| TGF- $\beta$  | Transforming growth factor beta                                      |
| THCA          | Thyroid carcinoma                                                    |
| THYM          | Thymoma                                                              |
| TIDE          | Tumor Immune Dysfunction and Exclusion                               |
| TIMER         | Tumor Immune Estimation Resource                                     |
| TISDB         | An integrated repository portal for tumor-immune system interactions |
| TMB           | Tumor mutation burden                                                |
| TME           | Tumor microenvironment                                               |
| TNF- $\alpha$ | Tumor necrosis factor - $\alpha$                                     |
| TRAF          | The tumor necrosis factor receptor-associated factor                 |
| Tregs         | Regulatory T-cells                                                   |
| TRK           | The tropomyosin receptor kinase                                      |
| UCEC          | Uterine corpus endometrial carcinoma                                 |
| UCS           | Uterine carcinosarcoma                                               |
| UMAP          | Uniform Manifold Approximation and Projection                        |
| UVM           | Uveal melanoma                                                       |

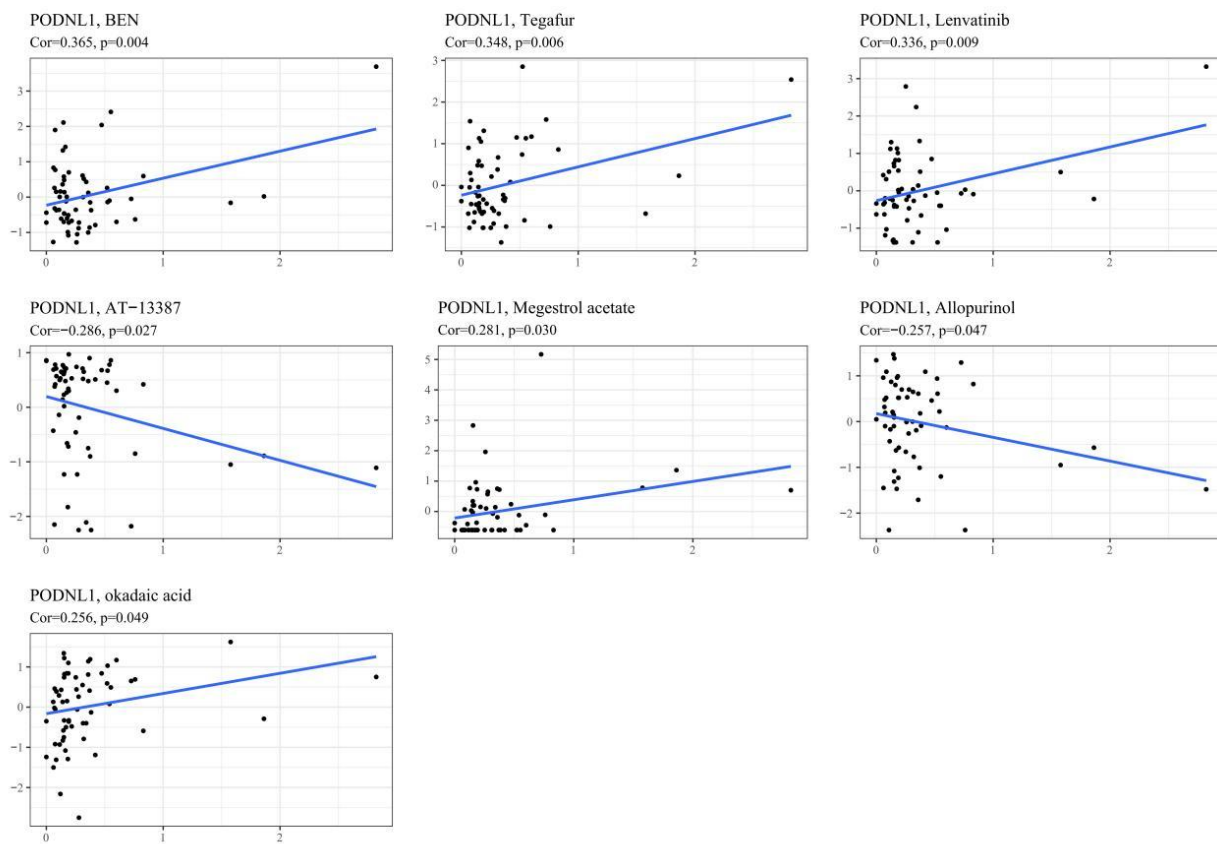

**Figure S1.** Correlation plots between PODNL1 expression and IC50 of drugs, including BEN, Tegafur, Lenvatinib, AT-13387, Megestrol acetate, Allopurinol, Okadaic acid.

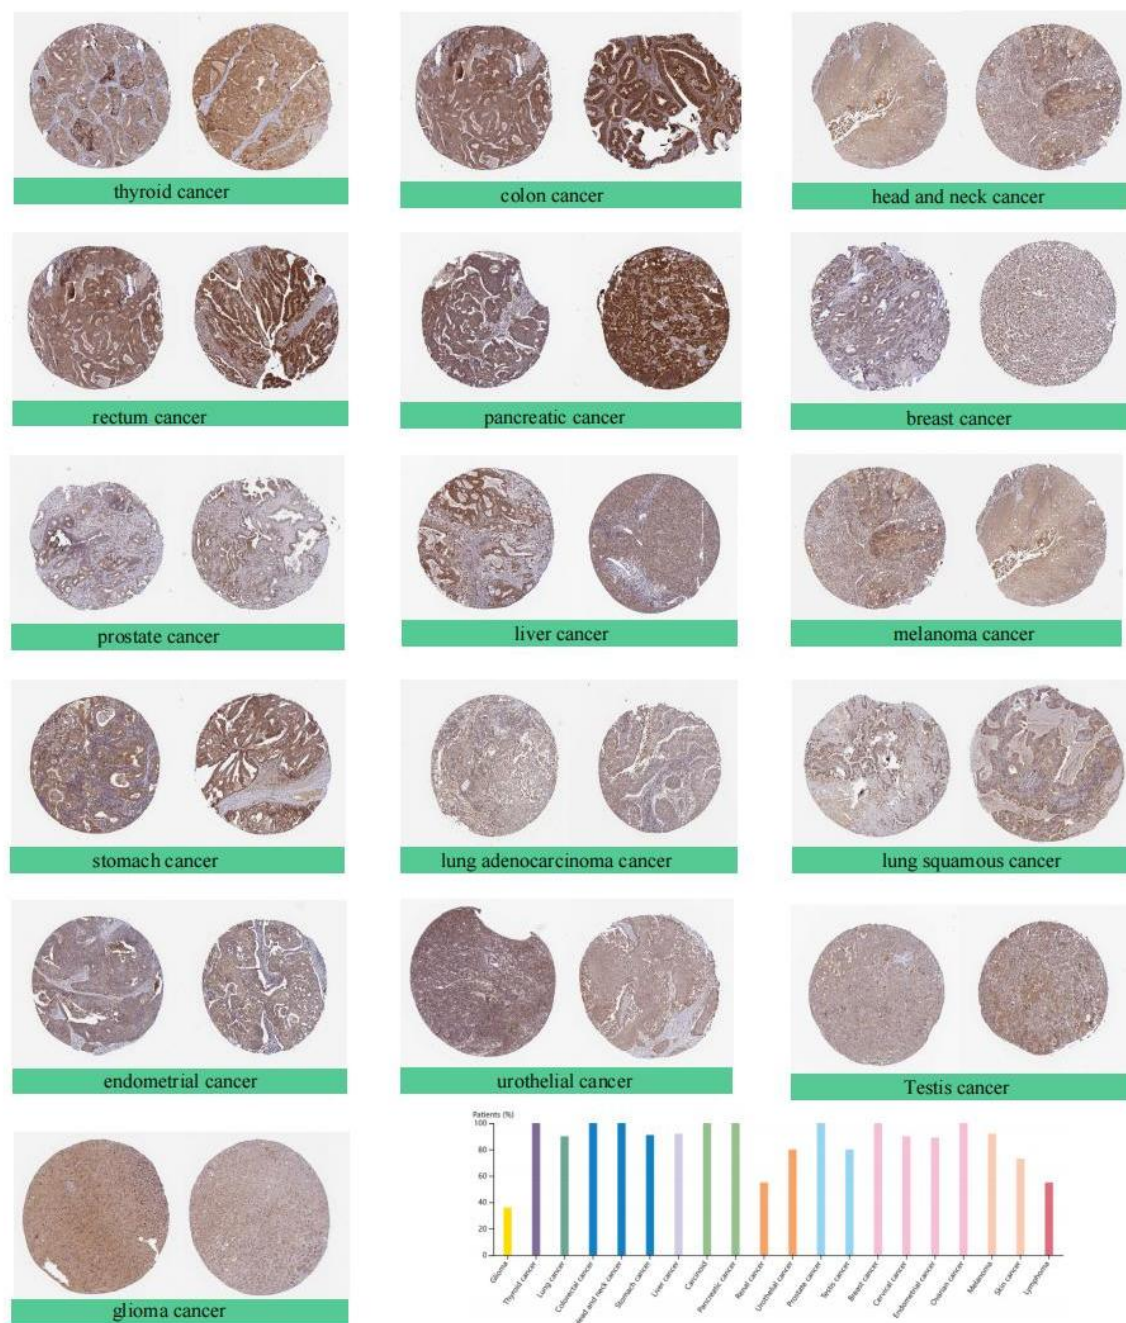

**Figure S2.** Immunohistochemistry images of tumor tissues showed moderate cytoplasmic positivity of PODNL1 (antibody HPA042807), including (A) thyroid cancer, (B) colon cancer, (C) head and neck cancer, (D) rectum cancer, (E) pancreatic cancer, (F) breast cancer, (G) prostate cancer, (H) liver cancer, (I) melanoma cancer, (J) stomach cancer, (K) lung adenocarcinoma, (L) lung squamous cancer, (M) endometrial cancer, (N) urothelial cancer, (O) testis cancer and (P) glioma.
